# Supplementary material for: Transcriptomic analysis of caecal tissue in inbred chicken lines that exhibit heritable differences in resistance to Campylobacter jejuni
Source: BMC Genomics. 2021 Jun 4;22:411. doi: 10.1186/s12864-021-07748-2 (PMC8176612; doi:10.1186/s12864-021-07748-2)
Supplement: Supplementary file 2 — Additional file 2: Table S1. DEGs in the caecal tonsils between control and infected line 61 birds at 1 dpi. A fold change greater than 1 indicates genes that were upregulated in infected compared to control birds whereas a fold change less than 1 indicates genes which were downregulated in infected compared to control birds. N = 3 for both groups. FC: fold change, FDR: False Discovery Rate. [file 12864_2021_7748_MOESM2_ESM.xlsx]

## Sheet: Sheet1
Gene ID	Gene name	FC	PValue	FDR
ENSGALG00000032894	MIP1a	18.7317	0.000564857	0.0476413
ENSGALG00000030197	RHACD8-4L	8.98968	0.000505458	0.0476413
ENSGALG00000039647	lncRNA	7.51726	0.000376778	0.0447924
ENSGALG00000032967	CD8 alpha chain-like 3	6.68218	0.00067305	0.0497578
ENSGALG00000029518	lncRNA	5.89542	0.000122125	0.0357843
ENSGALG00000044720	CD8a-like	5.08438	8.99333e-05	0.0335939
ENSGALG00000027051	MIP1a	5.0002	0.0001539	0.0357843
ENSGALG00000045776	CPN2	4.47159	3.75873e-05	0.0267399
ENSGALG00000028069	WNT16	4.41105	4.32538e-05	0.0269564
ENSGALG00000033094	NFIL3	4.35324	9.47477e-05	0.0342472
ENSGALG00000005515	CRYBB3	4.21308	0.000383101	0.0447924
ENSGALG00000027247	EOMES	3.90878	3.38179e-05	0.0267399
ENSGALG00000044218	CD8a-like	3.3612	0.000262174	0.0426666
ENSGALG00000045916	PRF1	3.22606	0.000285279	0.0431522
ENSGALG00000032820	immunoglobulin-like receptor CHIR2D-753 precursor	2.9778	0.000228519	0.0396515
ENSGALG00000027587	LRG1	2.77832	0.000124484	0.0357843
ENSGALG00000037740	GPR103	2.65402	0.000192455	0.0374251
ENSGALG00000045109	lncRNA	2.60185	0.000323716	0.0447637
ENSGALG00000002329	CCL1	2.55567	0.000154326	0.0357843
ENSGALG00000039419	lncRNA	2.49404	0.00015837	0.0357843
ENSGALG00000036470	P2RY12	2.44541	0.000142766	0.0357843
ENSGALG00000044175	CD7	2.40251	0.000414864	0.0447924
ENSGALG00000012538	NR4A2	2.38134	6.51296e-05	0.032379
ENSGALG00000028464	CD8a-like	2.35807	0.00013897	0.0357843
ENSGALG00000024466	CCL17	2.33259	0.000405004	0.0447924
ENSGALG00000044586	lncRNA	2.30736	0.000386162	0.0447924
ENSGALG00000028016	eye-globin	2.25765	0.000537986	0.0476413
ENSGALG00000045217	lncRNA	2.23911	0.000170932	0.0363299
ENSGALG00000028536	MPEG1	2.22475	4.17764e-05	0.0269564
ENSGALG00000026658	LACTBL1	2.21346	0.000458422	0.0464767
ENSGALG00000007001	TLR4	2.20257	0.000322447	0.0447637
ENSGALG00000044493	leucine-rich repeat-containing protein 4-like	2.17767	0.000200899	0.0379586
ENSGALG00000040367	P2RY14	2.14699	0.000551826	0.0476413
ENSGALG00000029472	CHIR-IG1-5	2.14401	0.000292924	0.0431522
ENSGALG00000016017	SLC4A11	2.1298	8.84029e-05	0.0335939
ENSGALG00000029632	CHST13	2.10548	4.97625e-05	0.02955
ENSGALG00000010269	KCNAB1	2.08316	0.000398047	0.0447924
ENSGALG00000000442	KCNA2	2.05481	0.000223345	0.0396515
ENSGALG00000023444	APELA	0.469059	0.00056508	0.0476413
ENSGALG00000035901	GDF6	0.461554	0.000565024	0.0476413
ENSGALG00000032668	lncRNA	0.453241	0.000425212	0.0450318
ENSGALG00000035026	SLC22A4	0.451458	0.00044134	0.0454779
ENSGALG00000008370	TRAK2	0.448713	0.000133018	0.0357843
ENSGALG00000039426	mucin-22-like	0.429393	0.000493231	0.0476413
ENSGALG00000034716	HEY2	0.426121	0.000559579	0.0476413
ENSGALG00000036723	serine protease inhibitor Kazal-type 6-like	0.392172	0.000383658	0.0447924
ENSGALG00000035619	MTTP	0.39014	0.000343769	0.0447924
ENSGALG00000006341	SLC25A48	0.390099	0.0004431	0.0454779
ENSGALG00000010785	ACOT11	0.374012	0.000611788	0.0479821
ENSGALG00000005975	zinc finger protein 488	0.369501	0.000420258	0.0447924
ENSGALG00000004346	P2RY4	0.364832	0.000367508	0.0447924
ENSGALG00000044925	lncRNA	0.362233	0.000280341	0.0431522
ENSGALG00000019716	KRT20	0.321649	0.00033581	0.0447924
ENSGALG00000027121	miRNA	0.306006	0.000220663	0.0396515
ENSGALG00000016858	ASBT	0.255256	1.52219e-05	0.0267399
ENSGALG00000010801	TMEM61	0.237655	0.000475548	0.0473469
ENSGALG00000000048	ATP6V1A-like	0.237115	0.000668849	0.0497578
ENSGALG00000014505	FGFBP1	0.218136	1.68257e-05	0.0267399
ENSGALG00000028376	FGF19	0.184987	3.51183e-05	0.0267399
ENSGALG00000013168	IAPP	0.184187	0.00012182	0.0357843
ENSGALG00000044618	SLC51B	0.180087	6.00152e-05	0.032379
ENSGALG00000001244	TBC1D24	0.119264	0.000537142	0.0476413
ENSGALG00000045737	TBC1D24	0.118991	0.000522703	0.0476413
ENSGALG00000030875	HMX2	0.0786261	0.000499514	0.0476413
ENSGALG00000002207	ATP6V1G3	0.0263952	9.09198e-05	0.0335939
ENSGALG00000040666	ATP6V0A4	0.0195885	0.000486867	0.0476413
ENSGALG00000007998	SLC26A4	0.0169285	3.01543e-05	0.0267399
ENSGALG00000014925	GPRC6A	0.0119072	0.000308183	0.044218
ENSGALG00000044387	SLC4A9	0.00952432	0.00023429	0.0401602
