# Supplementary material for: Transcriptomic analysis of caecal tissue in inbred chicken lines that exhibit heritable differences in resistance to Campylobacter jejuni
Source: BMC Genomics. 2021 Jun 4;22:411. doi: 10.1186/s12864-021-07748-2 (PMC8176612; doi:10.1186/s12864-021-07748-2)
Supplement: Supplementary file 3 — Additional file 3: Table S2. Significant GO Terms associated with DEGs in the caecal tonsils between infected and control line 61 birds at 1 dpi. DEGs were identified between 3 infected and 3 control birds. FDR: False Discovery Rate. [file 12864_2021_7748_MOESM3_ESM.xlsx]

## Sheet: Sheet1
GO Term	Name	No. of Genes	Direction	PValue	FDR
	GO_NEGATIVE_REGULATION_OF_INTERLEUKIN_17_PRODUCTION	6	Up	0.001	0.0263571
	GO_NUCLEOTIDE_TRANSMEMBRANE_TRANSPORT	10	Down	0.001	0.0263571
	GO_RESPONSE_TO_PROTOZOAN	9	Up	0.001	0.0263571
	GO_REGULATION_OF_INTERLEUKIN_17_PRODUCTION	10	Up	0.001	0.0263571
	GO_POSITIVE_REGULATION_OF_NF_KAPPAB_IMPORT_INTO_NUCLEUS	13	Up	0.001	0.0263571
	GO_NUCLEOTIDE_TRANSMEMBRANE_TRANSPORTER_ACTIVITY	16	Down	0.001	0.0263571
	GO_CHEMOKINE_ACTIVITY	8	Up	0.001	0.0263571
	GO_REGULATION_OF_RESPONSE_TO_TUMOR_CELL	4	Up	0.001	0.0263571
	GO_INTERLEUKIN_1_PRODUCTION	4	Up	0.001	0.0263571
	GO_NUCLEOTIDE_SUGAR_BIOSYNTHETIC_PROCESS	15	Down	0.001	0.0263571
